# Supplementary material for: Erratum for “Water Quality–Based Environmental Flow under Plausible Temperature and Pollution Scenarios” by Shushobhit Chaudhary, C. T. Dhanya, Arun Kumar, and Rehana Shaik
Source: Atypon-hosted journal article supplement (doi:10.1061/(asce)he.1943-5584.0001919), 2020-01-31
Supplement: supplemental_data_he.1943-5584.0001919_chaudhary.pdf [file supplemental_data_he.1943-5584.0001919_chaudhary.pdf]

## SUPPLEMENTAL DATA

*ASCE Journal of Hydrologic Engineering*

Erratum for “Water Quality–Based  
Environmental Flow under Plausible  
Temperature and Pollution Scenarios” by  
Shushobhit Chaudhary, C. T. Dhanya, Arun  
Kumar, and Rehana Shaik

Shushobhit Chaudhary, C. T. Dhanya, Arun Kumar, and Rehana  
Shaik

**DOI:** 10.1061/(ASCE)HE.1943-5584.0001919

© ASCE 2020

[www.ascelibrary.org](http://www.ascelibrary.org)

**Table S3.** Eflow recommendations considering different ratios of mean annual flow (MAF) based on hydrological-based Tennant method

| Objective           | Percentage of Mean Annual Flow (MAF) |          | Eflow of Yamuna River (m <sup>3</sup> /sec)<br>[Values in ft <sup>3</sup> /s]<br>MAF = 279.3 m <sup>3</sup> /sec [9864.2 ft <sup>3</sup> /s] |                                      | Eflow of Bhadra River (m <sup>3</sup> /sec)<br>MAF = 81.4 m <sup>3</sup> /sec |          |
|---------------------|--------------------------------------|----------|----------------------------------------------------------------------------------------------------------------------------------------------|--------------------------------------|-------------------------------------------------------------------------------|----------|
|                     | Oct–March                            | Apr–Sept | Oct–March                                                                                                                                    | Apr–Sept                             | Oct–March                                                                     | Apr–Sept |
| Flushing or Maximum | 200                                  |          | 558.6<br>[19728.4 ft <sup>3</sup> /s]                                                                                                        |                                      | 162.8                                                                         |          |
| Optimum range       | 60-100                               |          | 167.6-279.3<br>[5918.5 - 9864.2 ft <sup>3</sup> /s]                                                                                          |                                      | 48.8 - 81.4                                                                   |          |
| Outstanding         | 40                                   | 60       | 111.7<br>[3945.7 ft <sup>3</sup> /s]                                                                                                         | 167.6<br>[5918.5 ft <sup>3</sup> /s] | 32.6                                                                          | 48.8     |
| Excellent           | 30                                   | 50       | 83.8<br>[2959.3 ft <sup>3</sup> /s]                                                                                                          | 139.7<br>[4932.1 ft <sup>3</sup> /s] | 24.4                                                                          | 40.7     |
| Good                | 20                                   | 40       | 55.8<br>[1972.8 ft <sup>3</sup> /s]                                                                                                          | 111.7<br>[3945.7 ft <sup>3</sup> /s] | 16.3                                                                          | 32.6     |
| Fair or Degrading   | 10                                   | 30       | 27.9<br>[986.4 ft <sup>3</sup> /s]                                                                                                           | 83.8<br>[2959.3 ft <sup>3</sup> /s]  | 8.1                                                                           | 24.4     |
| Poor or Minimum     | 10                                   |          | 27.9 [986.4 ft <sup>3</sup> /s]                                                                                                              |                                      | 8.1                                                                           |          |
| Severe Degradation  | 0-10                                 |          | 0 - 27.9 [986.4 ft <sup>3</sup> /s]                                                                                                          |                                      | 0 - 8.1                                                                       |          |

Source: Data from Tennant (1976).

**Table S5.** Eflow recommendations considering different fractions of MAF and mean monthly flow (MMF) based on Tessmann method

| <b>Month</b> | <b>Recommended Eflow (m<sup>3</sup>/sec)</b> |               |
|--------------|----------------------------------------------|---------------|
|              | <b>Yamuna</b>                                | <b>Bhadra</b> |
| <b>Jan</b>   | 93.8 [3312.8 ft <sup>3</sup> /s]             | 14.4          |
| <b>Feb</b>   | 102.7 [3627.7 ft <sup>3</sup> /s]            | 7.3           |
| <b>Mar</b>   | 111.7 [3945.7 ft <sup>3</sup> /s]            | 4.2           |
| <b>Apr</b>   | 111.7 [3945.7 ft <sup>3</sup> /s]            | 4.4           |
| <b>May</b>   | 111.7 [3945.7 ft <sup>3</sup> /s]            | 5.8           |
| <b>Jun</b>   | 111.7 [3945.7 ft <sup>3</sup> /s]            | 39.7          |
| <b>Jul</b>   | 195.0 [6885.5 ft <sup>3</sup> /s]            | 115.1         |
| <b>Aug</b>   | 368.5 [13014.0 ft <sup>3</sup> /s]           | 118.1         |
| <b>Sep</b>   | 234.8 [8293.3 ft <sup>3</sup> /s]            | 44.3          |
| <b>Oct</b>   | 111.7 [3945.7 ft <sup>3</sup> /s]            | 34.2          |
| <b>Nov</b>   | 111.7 [3945.7 ft <sup>3</sup> /s]            | 32.6          |
| <b>Dec</b>   | 111.7 [3646.7 ft <sup>3</sup> /s]            | 21.4          |

Source: Data from Tessmann (1980).

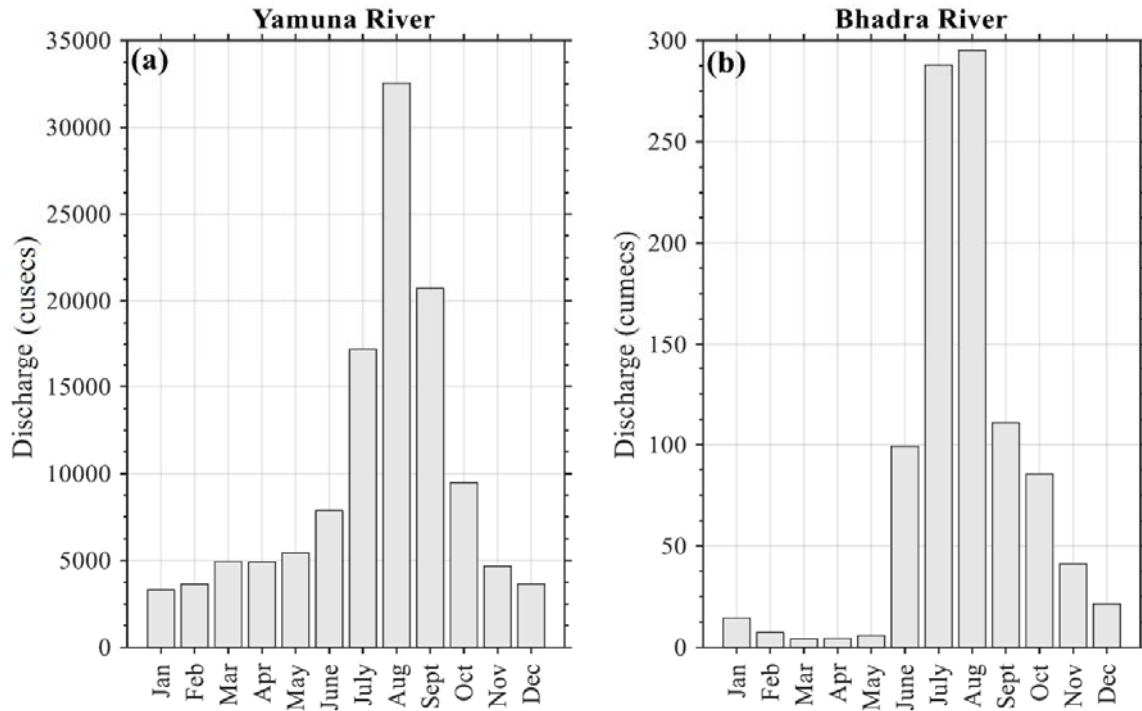

**Fig. S2. (a)** Observed unregulated flow at the upstream of Hathinikund Barrage on the Yamuna River over the period of 1995–2004. Units of discharge are in cusecs ( $\text{ft}^3/\text{s}$ ); and **(b)** Average inflow to the Bhadra reservoir upstream of the Bhadravati segment of Bhadra River over the period of 1981–1999. Units of discharge are in cusecs ( $\text{m}^3/\text{sec}$ ).

## References

- Tennant, D. L. 1976. "Instream flow regimens for fish, wildlife, recreation and related environmental resources." *Fisheries* 1 (4): 6–10. [https://doi.org/10.1577/1548-8446\(1976\)001<0006:IFRFFW>2.0.CO;2](https://doi.org/10.1577/1548-8446(1976)001<0006:IFRFFW>2.0.CO;2).
- Tessmann, S. 1980. "Environmental assessment," Technical Appendix E in *Environmental use sector: Reconnaissance elements of the Western Dakotas region of South Dakota study*. Brookings, SD: Water Resources Institute.
